# Supplementary material
Source: Springer Nature journal article supplement (https://www.springermedizin.de/resource/supplementary/12885_2012_3775_MOESM10_ESM.pdf/9464424)

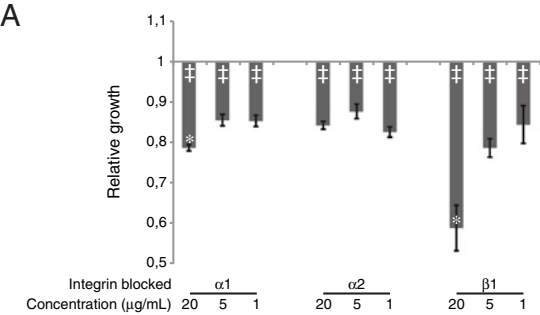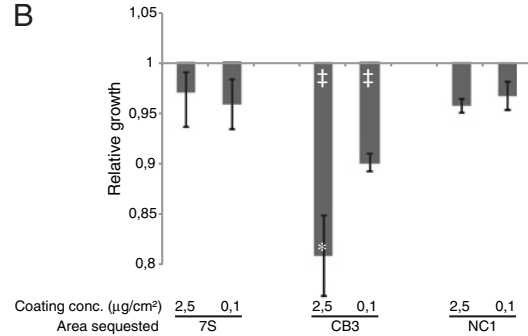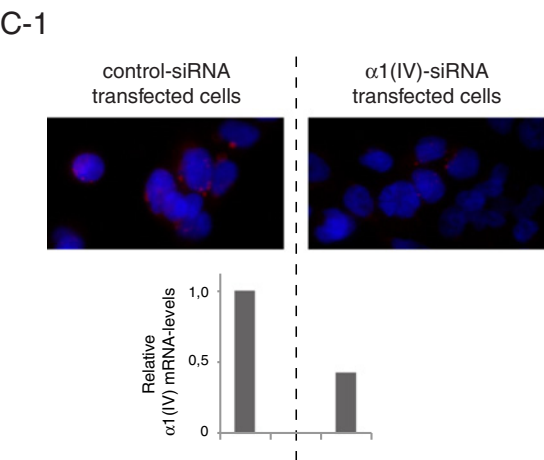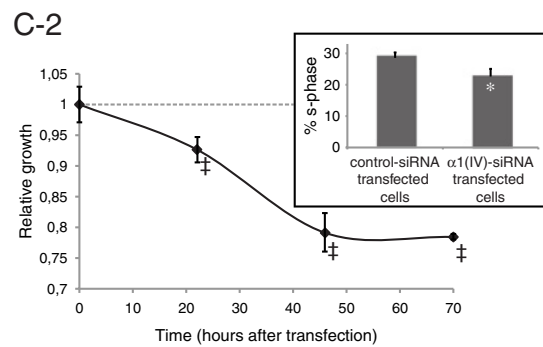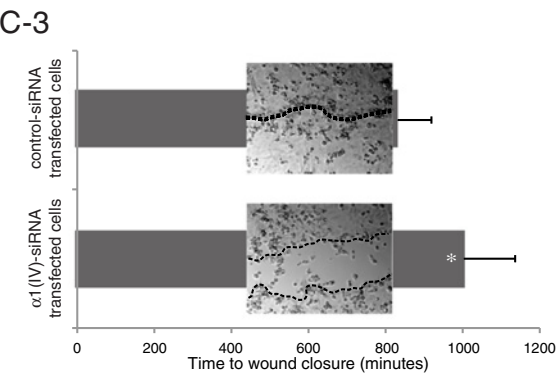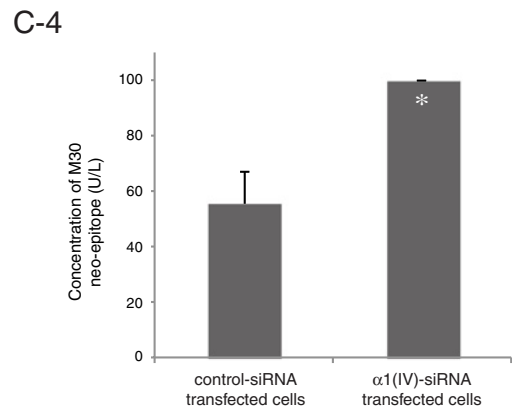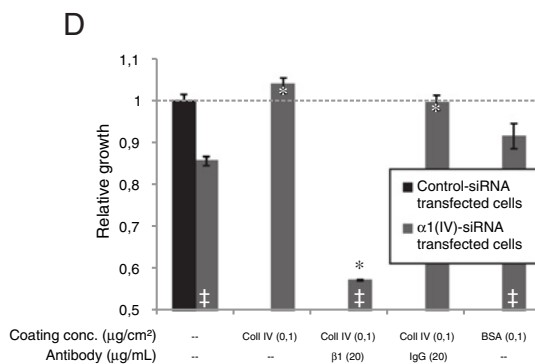

Supplement: MOESM10 [file 9464424]
